# Supplementary material for: Synthesis, characterization, second and third order non-linear optical properties and luminescence properties of 1,10-phenanthroline-2,9-di(carboxaldehyde phenylhydrazone) and its transition metal complexes
Source: publisher site journal article supplement (doi:10.1515/chem-2017-0036), 2017-12-13
Supplement: Supplementary file 1 [file chem-2017-0036_sm.pdf]

## Supplementary Information

## Open Access

G. Krishna Prasad, S.S.P. Prashanth, S. Srivastava, G. Nageswara Rao, D. Rajesh Babu\*

# Supplement: Synthesis, characterization, second and third order non-linear optical properties and luminescence properties of 1,10-phenanthroline-2,9-di(carboxaldehyde phenylhydrazone) and its transition metal complexes

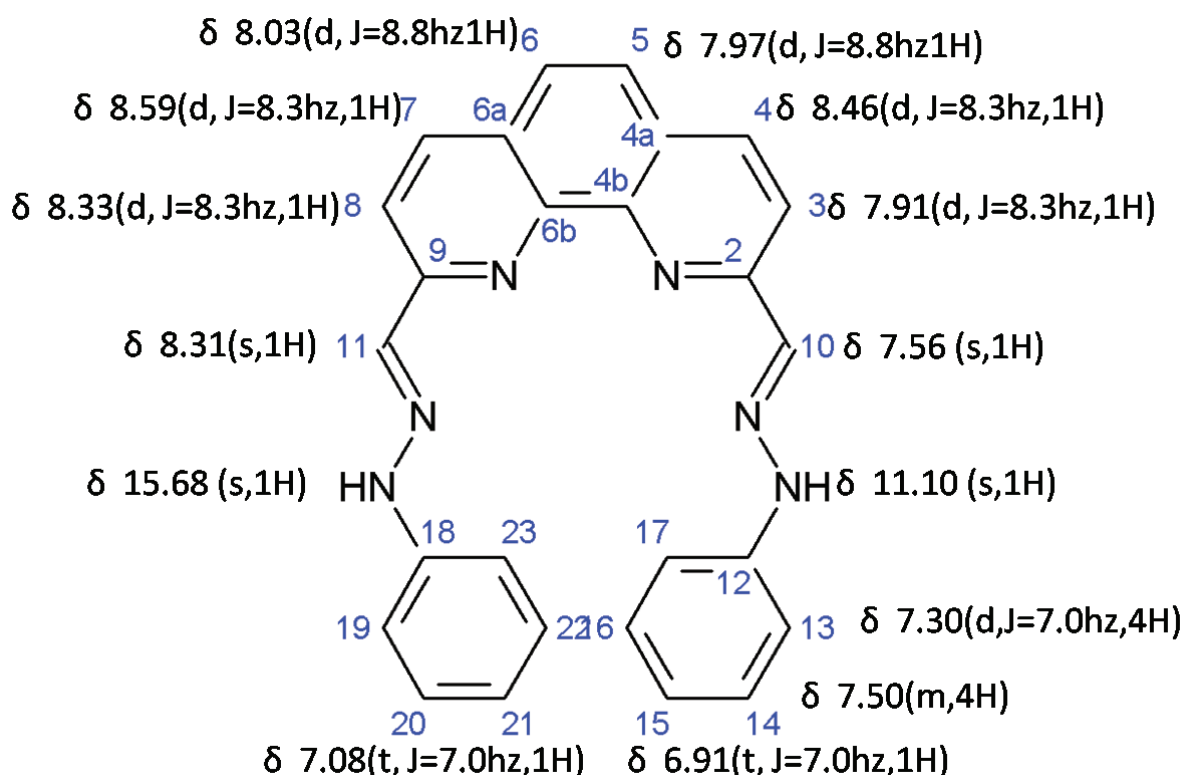

Figure S1: PMR assignment of L

\*Corresponding author: D. Rajesh Babu: Department of Chemistry, Sri Sathya Sai Institute of Higher Learning, Prasanthinilayam, India, 515134, E-mail: drajeshbabu@sssihl.edu.in

G. Krishna Prasad, G. Nageswara Rao: Department of Chemistry, Sri Sathya Sai Institute of Higher Learning, Prasanthinilayam, India, 515134

S.S.P. Prashanth, S. Srivastava: Department of Physics, Sri Sathya Sai Institute of Higher Learning, Prasanthinilayam, India, 515134

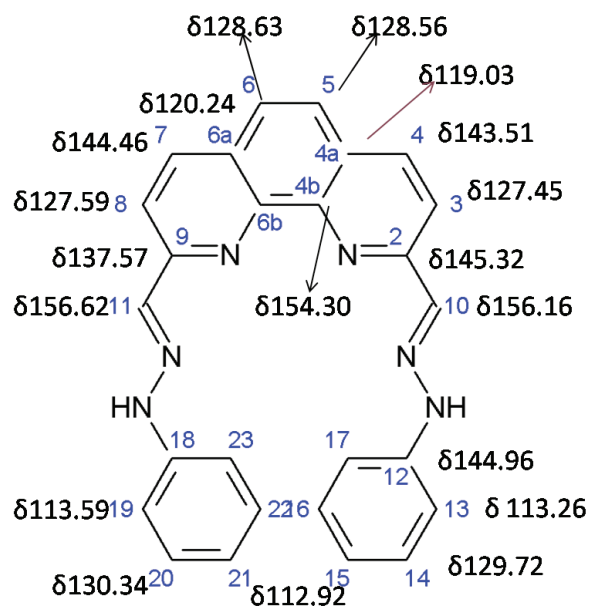Figure S2:  $^{13}\text{C}$  NMR assignment of L.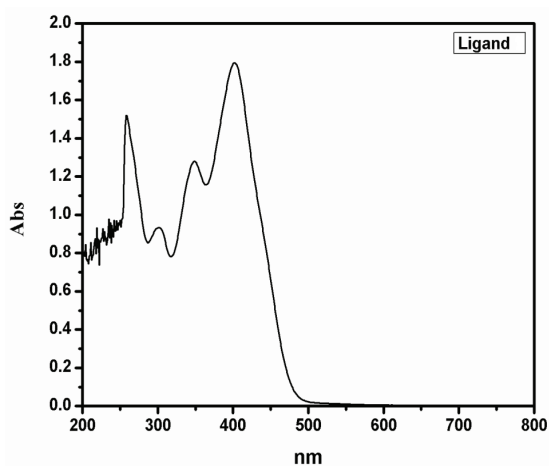

Figure S3: UV-Vis spectrum of L.

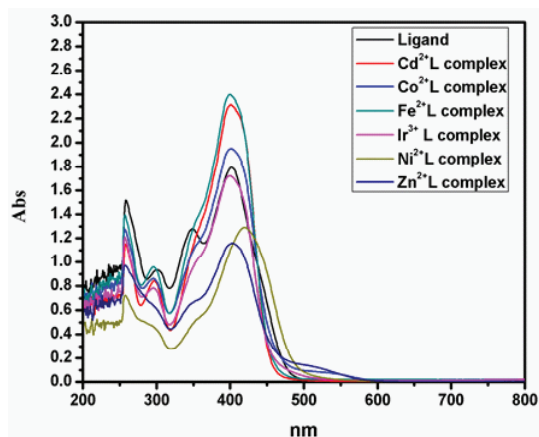

Figure S4: UV-Vis spectra of L and its complexes.

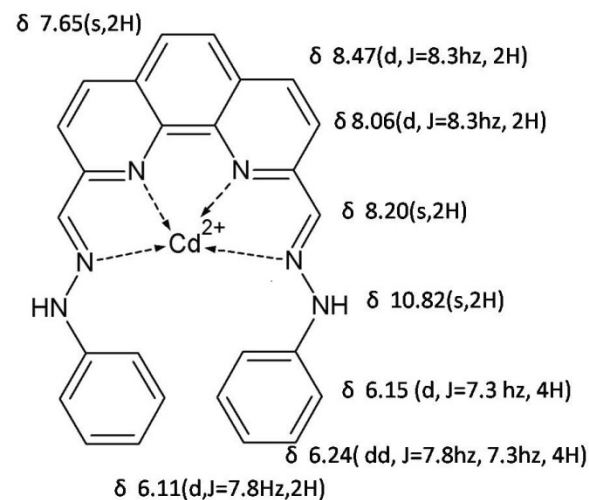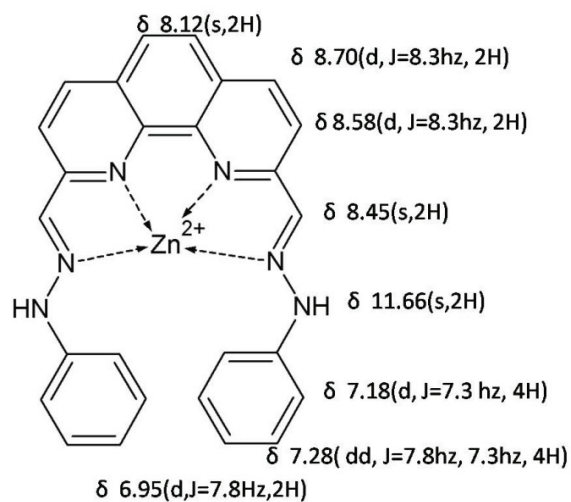Figure S5: PMR assignments of  $\text{Cd}^{2+}$  and  $\text{Zn}^{2+}$  complexes.

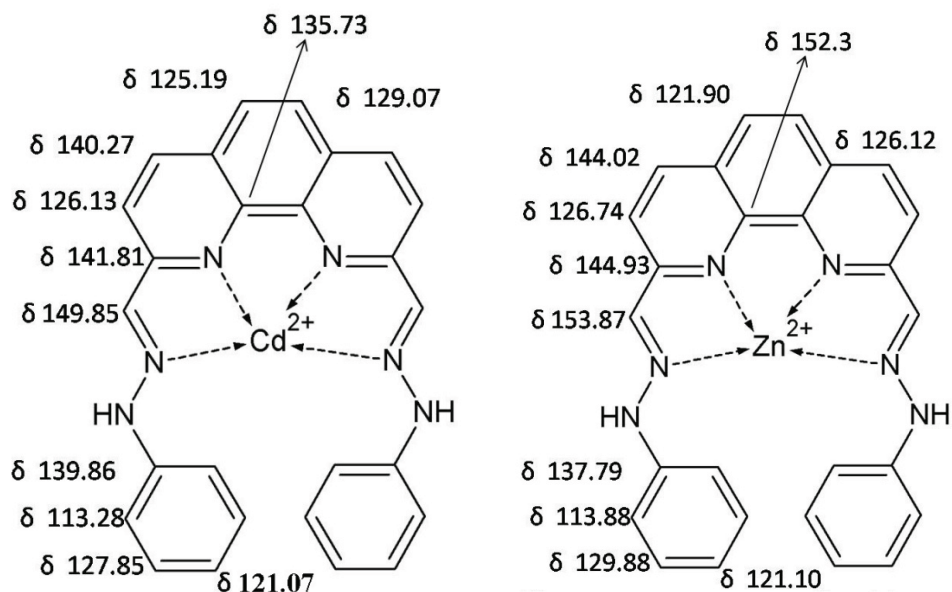

Figure S6:  $^{13}\text{C}$  NMR assignments of  $\text{Cd}^{2+}$  and  $\text{Zn}^{2+}$  complexes.

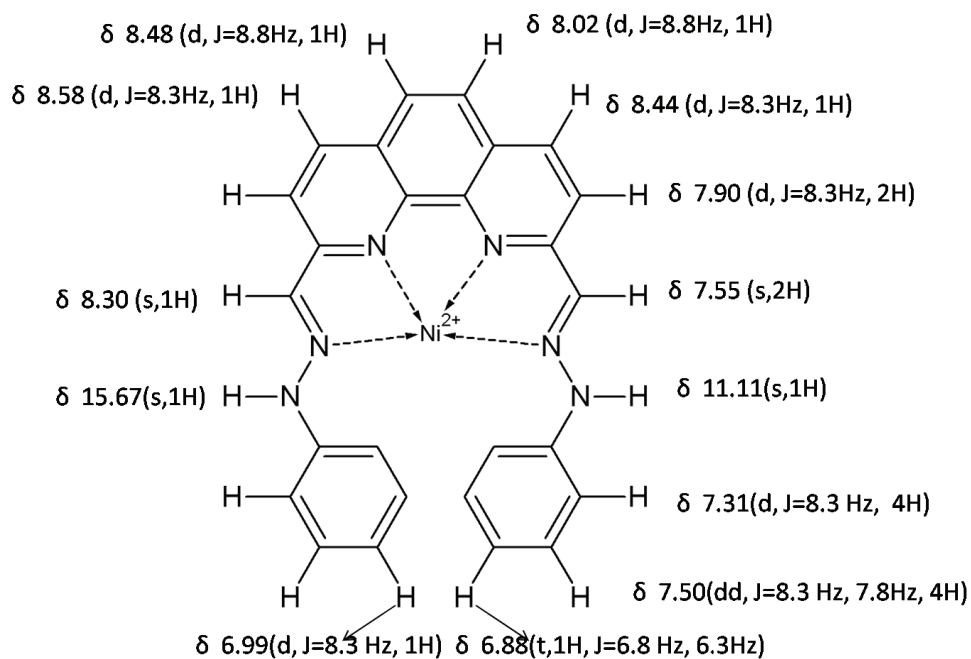

Figure S7: Paramagnetic PMR assignment of  $\text{Ni(II)}$  complex.

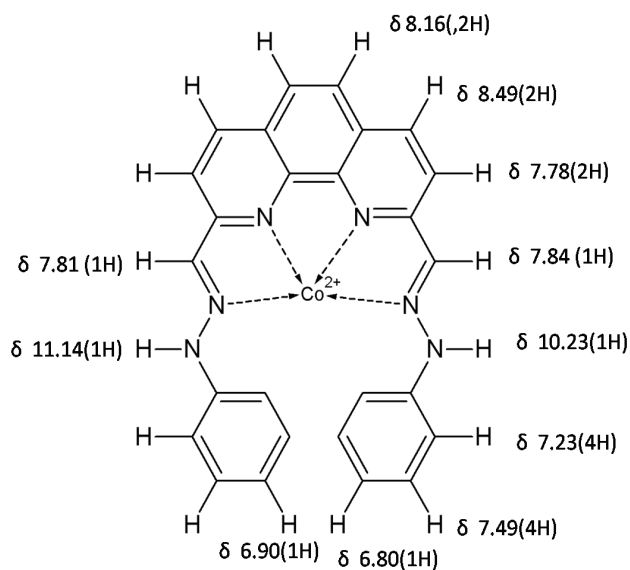

FigureS8: Paramagnetic PMR assignment of Co(II) complex.

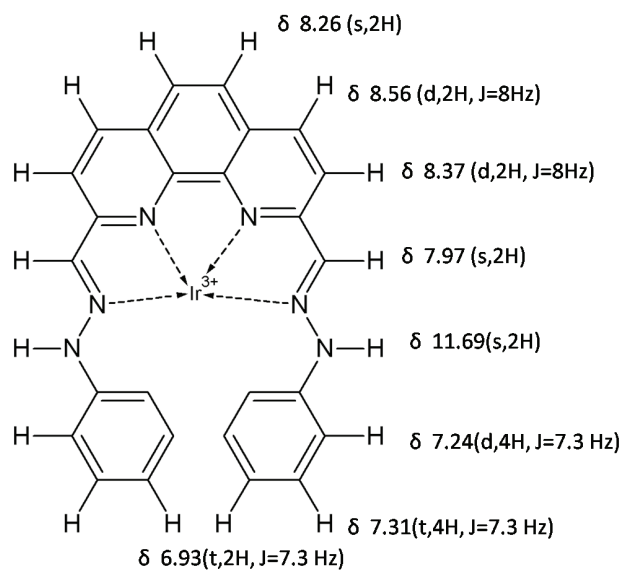

FigureS10: Paramagnetic PMR assignment of Ir(III) complex.

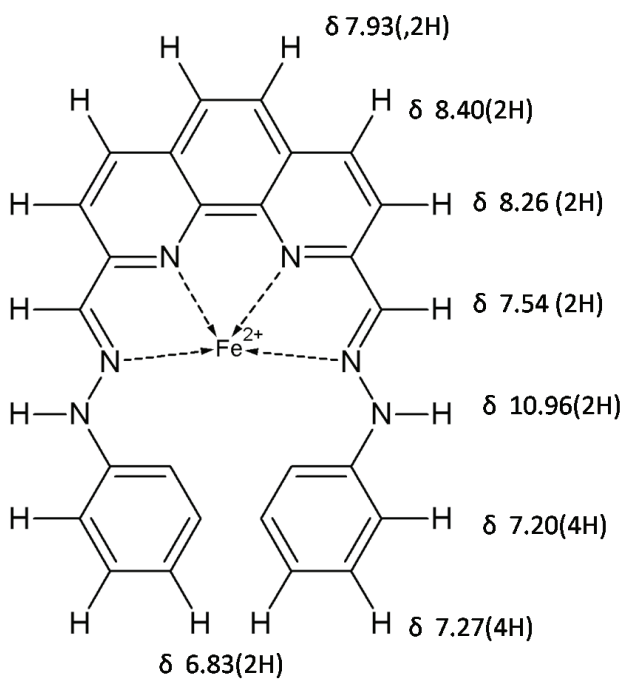

FigureS9: Paramagnetic PMR assignment of Fe(II) complex.

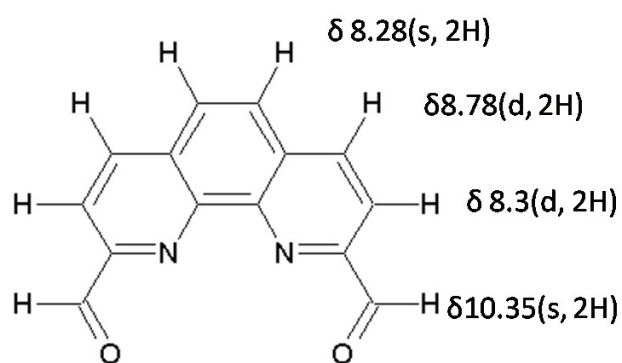

Figure S11: PMR assignment of Phen dialdehyde.

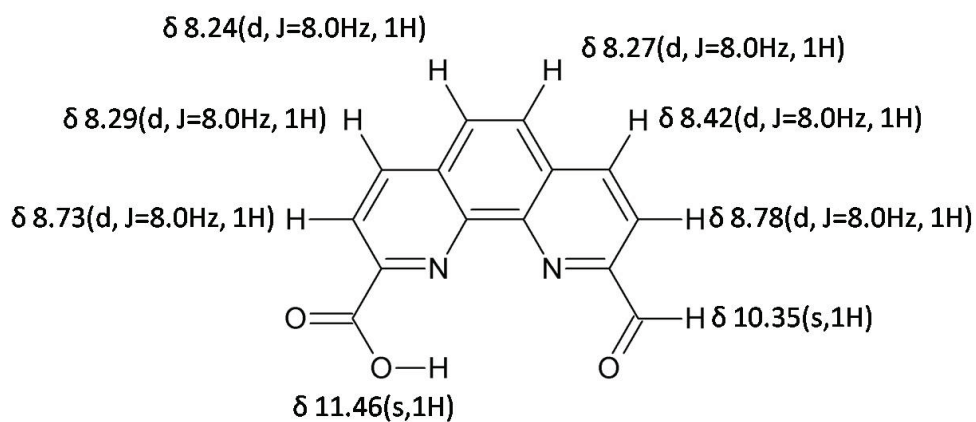

**Figure S12:** PMR assignment of 1,10-Phenanthroline-9-al-2-carboxylic acid.
